# Supplementary material
Source: publisher figshare collection journal article supplement (https://acs.figshare.com/ndownloader/files/4168066)
Supplement: Supplementary file 1 [file 4168066]

## Supporting Information

### A Novel Lanreotide-Encoded Micelle System Targets Paclitaxel to the Tumors with Overexpression of Somatostatin Receptors

Nan Zheng<sup>1</sup>, Wenbing Dai<sup>1</sup>, Wenwen Du<sup>1</sup>, Haoran Zhang<sup>1</sup>, Liandi Lei<sup>1</sup>, Hua Zhang<sup>1</sup>, Xueqing Wang<sup>1</sup>, Jiancheng Wang<sup>1</sup>, Xuan Zhang<sup>1</sup>, Jinming Gao<sup>2</sup> and Qiang Zhang<sup>1\*</sup>

<sup>1</sup> State Key Laboratory of Natural and Biomimetic Drugs, School of Pharmaceutical Sciences, Peking University, Beijing, People's Republic of China

<sup>2</sup> Harold C. Simmons Comprehensive Cancer Center, Department of Pharmacology, UT Southwestern Medical Center, Dallas, TX 75390, USA

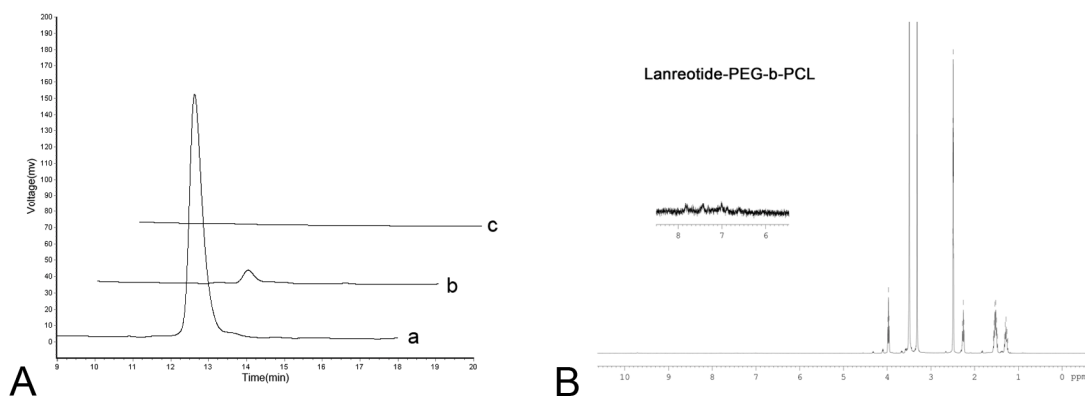

**Figure S1.** Conjugation of lanreotide to NHS-PEG-b-PCL. (A) RP-HPLC assessment of unconjugated lanreotide: (a) free lanreotide in reaction mixture at the initial time, (b) NHS-PEG-b-PCL and lanreotide in a molar ratio of 1.5:1 in the reaction mixture after reaction for 48h at room temperature, and (c) lyophilized Lanreotide-PEG-b-PCL after reaction. (B) <sup>1</sup>H-NMR spectrum of Lanreotide-PEG-b-PCL. NMR showed a multiplet at  $\delta$ 7.1-7.9 ppm from phenyl protons, which is characteristic of lanreotide, appeared in the reaction product.

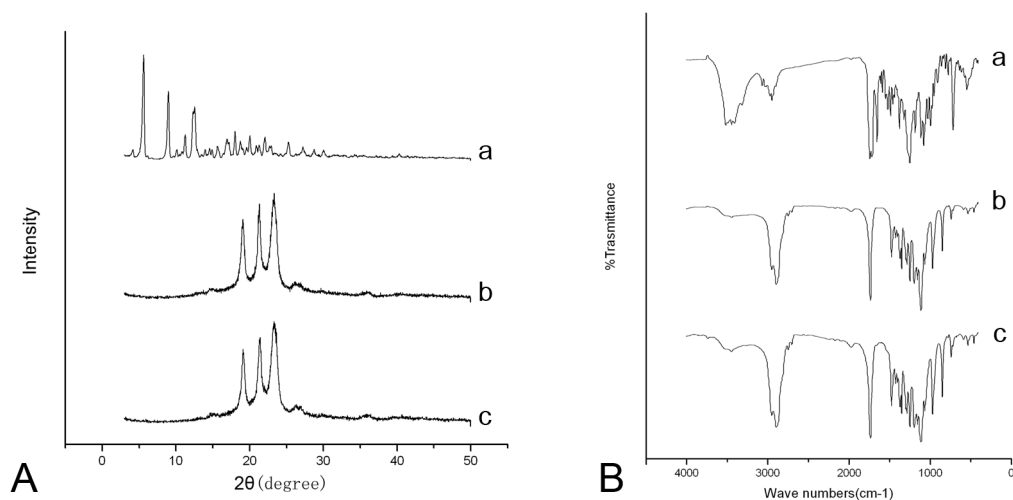

**Figure S2.** (A) XRD curves of (a) PTX, (b) lyophilized blank PEG-b-PCL micelles, (c) lyophilized PTX-loaded PEG-b-PCL micelles; (B) FTIR spectra of (a) PTX, (b) lyophilized blank PEG-b-PCL micelles, (c) lyophilized PTX-loaded PEG-b-PCL micelles.

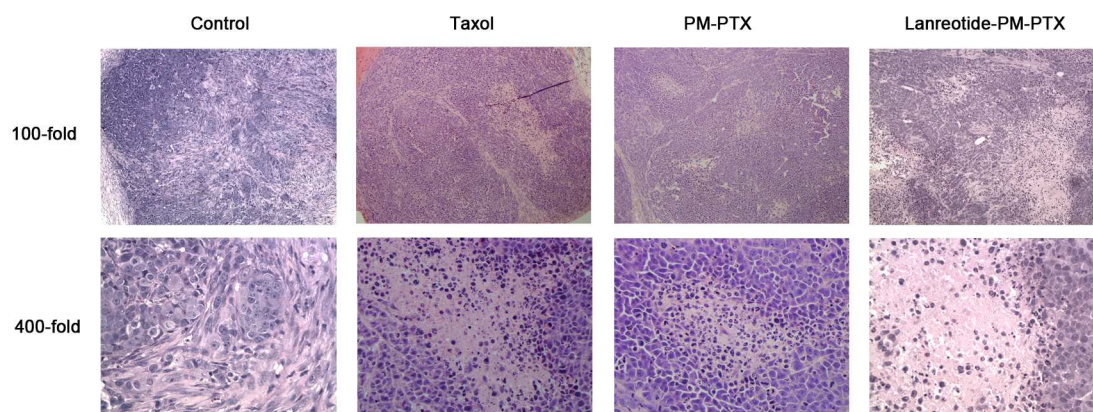

**Figure S3.** Histological (H&E) analysis of tumor samples from different treatment groups. 17 days after H446 cell inoculation, animals were sacrificed, and tumors were removed, fixed, paraffin embedded, sectioned at 5 $\mu$ m, and stained with H&E. Magnification,  $\times 100$  or  $\times 400$ .
